# Supplementary material for: Growth-Driven Polymorphism Engineering and Direct Phase Modulation of α- and β′-In2Se3
Source: Research Square preprint supplement (doi:10.21203/rs.3.rs-7385740/v1), 2025-08-28
Supplement: Supplementary file 1 [file fb828ff61c9f7058613ada7b.docx]

**Supplementary Information for**

**Growth-Driven Polymorphism Engineering and Direct Phase Modulation of α- and β′-In2Se3**

**Lei Xu1, Dongyan Liu1, Zhenhua Wu1, Han Chen1, Yutao Han1,2, Mingzheng Wang2,3, Haoyue Guo1, Tian Tan1, Yakui Mu1, Yang Wang1, Zengqin Song1, Qunli Rao4, Xuewei Feng1, Yakun Yuan2,5, Lei Shi6, Xiaotian Zhang1* and Tianru Wu1***

1School of Mechanical Engineering, Shanghai Jiao Tong University, Shanghai 200240, P. R. China

2Future Material Innovation Center, Zhangjiang Institute for Advanced Study, Shanghai Jiao Tong University, Shanghai, 200240, P. R. China

3School of Materials Science and Engineering, Shanghai Jiao Tong University, Shanghai, 200240, P. R. China

4Instrumental Analysis Center, Shanghai Jiao Tong University, Shanghai, 200240, P. R. China

5School of Physics and Astronomy, Shanghai Jiao Tong University, Shanghai, 200240, P. R. China

6Hefei National Research Center for Physical Sciences at the Microscale, University of Science and Technology of China, Hefei, Anhui 230026, P. R. China

* E-mail: [xiaotianzhang@sjtu.edu.cn](mailto:xiaotianzhang@sjtu.edu.cn) * E-mail: [trwu@sjtu.edu.cn](mailto:trwu@sjtu.edu.cn)

**Table of Contents**

[Supplementary Fig. 1| Time dependent PVD growth of large area In](#_Toc31220)[2](#_Toc31220)[Se](#_Toc31220)[3](#_Toc31220) [films. 4](#_Toc31220)

[Supplementary Fig. 2| TEM and polarized light microscopy characterization of β'-In](#_Toc14492)[2](#_Toc14492)[Se](#_Toc14492)[3](#_Toc14492) [5](#_Toc14492)

[Supplementary Fig. 3| Raman characterization of In](#_Toc32299)[2](#_Toc32299)[Se](#_Toc32299)[3](#_Toc32299) [films grown on mica substrates via CVD and PVD under various growth conditions 5](#_Toc32299)

[Supplementary Fig. 4| SHG characterization of In](#_Toc8604)[2](#_Toc8604)[Se](#_Toc8604)[3](#_Toc8604) [films grown on mica substrates via CVD and PVD under various growth conditions 6](#_Toc8604)

[Supplementary Fig. 5| PL characterization of In](#_Toc12514)[2](#_Toc12514)[Se](#_Toc12514)[3](#_Toc12514) [films grown on mica substrates via CVD and PVD under various growth conditions 7](#_Toc12514)

[Supplementary Fig. 6| In situ temperature dependent XRD full spectrum of α-In](#_Toc21618)[2](#_Toc21618)[Se](#_Toc21618)[3](#_Toc21618) [powder 7](#_Toc21618)

[Supplementary Fig. 7| Comparison of XRD peak shifts during the α→β→β′ phase transition 8](#_Toc31499)

[Supplementary Fig. 8| Phase characterization of α-In](#_Toc790)[2](#_Toc790)[Se](#_Toc790)[3](#_Toc790) [cooled to room temperature at different cooling rates after heating 9](#_Toc790)

[Supplementary Fig. 9| Cross-sectional TEM characterization of β'-In](#_Toc10336)[2](#_Toc10336)[Se](#_Toc10336)[3](#_Toc10336) [grown on rigid HOPG substrates 9](#_Toc10336)

[Supplementary Fig. 10| In situ optical microscopy image of time-dependent β'→α phase transition 10](#_Toc11636)

[Supplementary Fig. 11| AFM image of wrinkles generated by stress release. 10](#_Toc30671)

[Supplementary Fig. 12| In situ strain release was performed on CVD grown triangular β′-In](#_Toc8876)[2](#_Toc8876)[Se](#_Toc8876)[3](#_Toc8876) [domain 11](#_Toc8876)

[Supplementary Fig. 13| In situ strain release was performed on CVD grown continuous β′-In](#_Toc56)[2](#_Toc56)[Se](#_Toc56)[3](#_Toc56) [film 11](#_Toc56)

[Supplementary Fig. 14| In situ strain release was performed on PVD grown triangular β′-In](#_Toc6485)[2](#_Toc6485)[Se](#_Toc6485)[3](#_Toc6485) [domain 11](#_Toc6485)

[Supplementary Fig. 15| In situ strain release was performed on PVD grown continuous β′-In](#_Toc5167)[2](#_Toc5167)[Se](#_Toc5167)[3](#_Toc5167) [film 12](#_Toc5167)

[Supplementary Fig. 16| HAADF images of kinks located at bottom of the wrinkle 12](#_Toc32450)

[Supplementary Fig. 17| Polarized light optical microscopy image of disappearance of distinctive domain structures following phase transition 13](#_Toc25750)

[Supplementary Fig. 18| Optical image of centimeter-scale α-In](#_Toc23971)[2](#_Toc23971)[Se](#_Toc23971)[3](#_Toc23971) [films fabricated by mechanical-contact-induced stress release 13](#_Toc23971)

[Supplementary Fig. 19| Characterization of the (00l) interplanar spacing shifts of β'-In](#_Toc24913)[2](#_Toc24913)[Se](#_Toc24913)[3](#_Toc24913) [before and after stress release 14](#_Toc24913)

[Supplementary Fig. 20| Characterization of physical properties before and after stress release 14](#_Toc32374)

[Supplementary Fig. 21| Characterization of the (00l) interplanar spacing shifts of released α-In](#_Toc4201)[2](#_Toc4201)[Se](#_Toc4201)[3](#_Toc4201) [after annealing 15](#_Toc4201)

[Supplementary Fig. 22| Characterization of the (110) interplanar spacing shifts of released α-In](#_Toc5963)[2](#_Toc5963)[Se](#_Toc5963)[3](#_Toc5963) [after annealing 15](#_Toc5963)

[Supplementary Fig. 23| Characterization of the (100) peak shifts of released α-In](#_Toc24858)[2](#_Toc24858)[Se](#_Toc24858)[3](#_Toc24858) [after annealing 16](#_Toc24858)

[Supplementary Fig. 24| Cross-sectional TEM characterization of β'-In](#_Toc20236)[2](#_Toc20236)[Se](#_Toc20236)[3](#_Toc20236) [on rigid SiO](#_Toc20236)[2](#_Toc20236)[/Si substrates (after annealing) 17](#_Toc20236)

[Supplementary Fig. 25| Angle-resolved SHG spectra of strain-released α-In](#_Toc27716)[2](#_Toc27716)[Se](#_Toc27716)[3](#_Toc27716) [films on mica after annealing 17](#_Toc27716)

[Supplementary Fig. 26| Annealing of stress-released α-In](#_Toc17379)[2](#_Toc17379)[Se](#_Toc17379)[3](#_Toc17379) [eliminates its ferroelectricity 18](#_Toc17379)

[Supplementary Fig. 27| Operational states diagrams of vertical α-In](#_Toc16871)[2](#_Toc16871)[Se](#_Toc16871)[3](#_Toc16871)[/β′-In₂Se₃ Fe-FETs under P-down and P-up conditions 18](#_Toc16871)


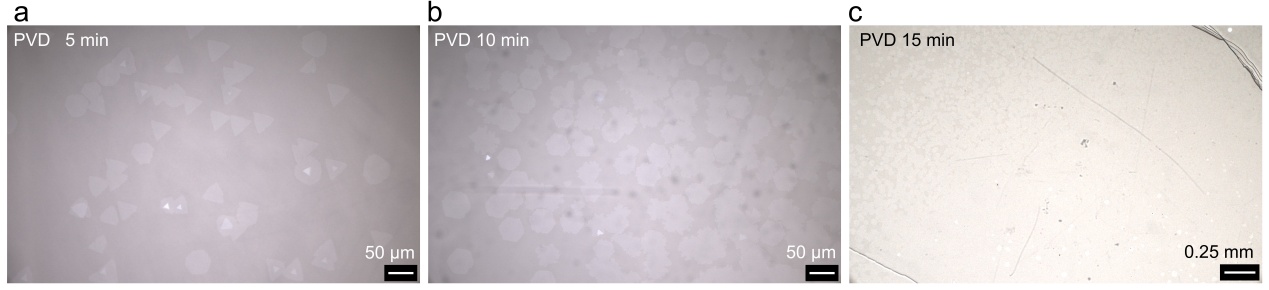


Supplementary Fig. 1| Time dependent PVD growth of large area In2Se3 films. **b** 5 min growth with triangle domain **b** 10 min growth with merging hexagonal domain. **c** 15 min growth with large area films.


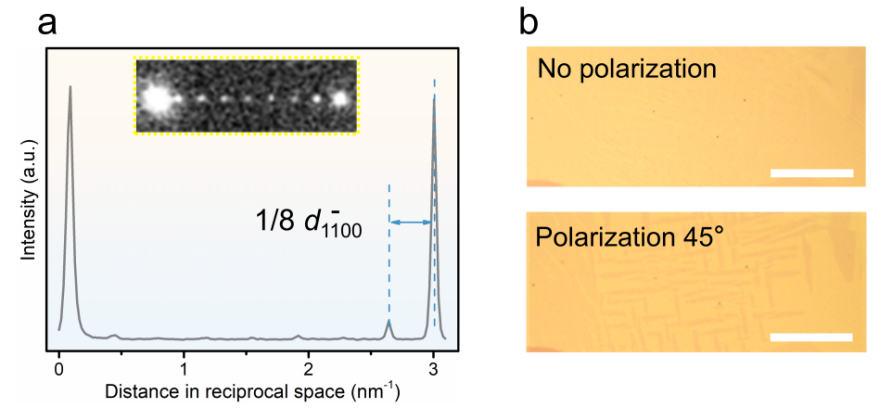


Supplementary Fig. 2| TEM and polarized light microscopy characterization of β'-In2Se3**.** **a** Magnified diffraction pattern and intensity profile of the area indicated by the yellow dashed rectangle in Fig. 1a **b** Polarized light optical microscopy of as grown In2Se3 film. Scale bar: 25 um. Polarized light optical microscopy image at the polarizer azimuth angle φ = 45° presenting the typical domain structure of β'-In2Se3.


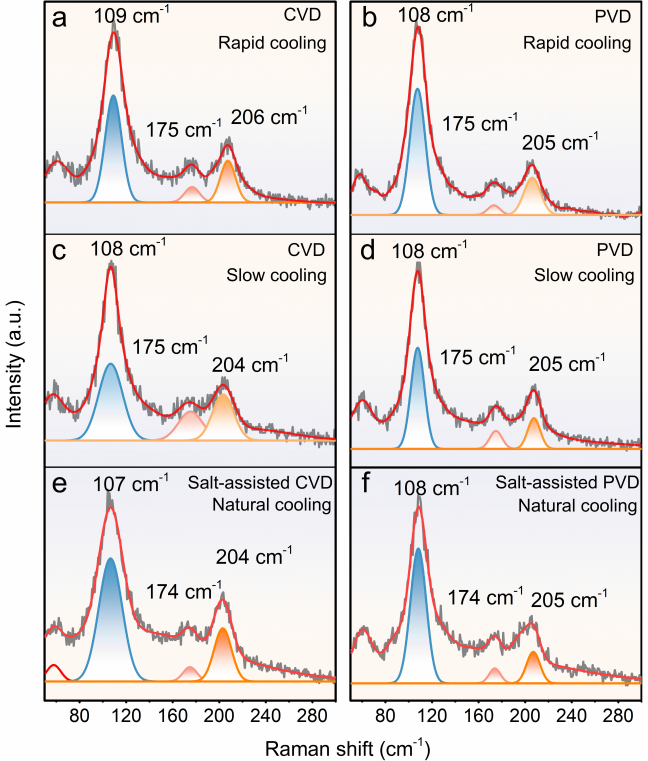


Supplementary Fig. 3| Raman characterization of In2Se3 films grown on mica substrates via CVD and PVD under various growth conditions**.** Raman spectrum of In2Se3 grown under rapid cooling conditions via **a** CVD and **b** PVD, under slow cooling conditions via **c** CVD and **d** PVD, under natural cooling conditions via **e** salt-assisted CVD **f** salt-assisted PVD.


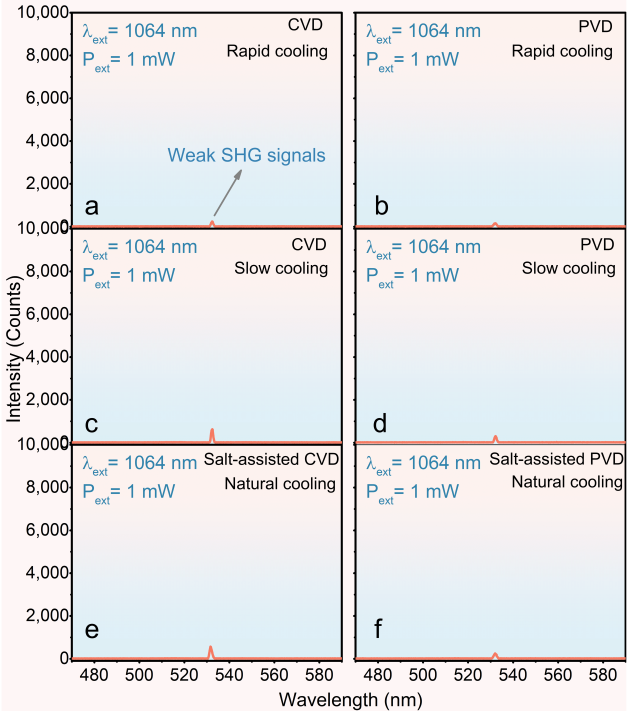


Supplementary Fig. 4| SHG characterization of In2Se3 films grown on mica substrates via CVD and PVD under various growth conditions**.** SHG spectrum of In2Se3 grown under rapid cooling conditions via **a** CVD and **b** PVD, under slow cooling conditions via **c** CVD and **d** PVD, under natural cooling conditions via **e** salt-assisted CVD **f** salt-assisted PVD.


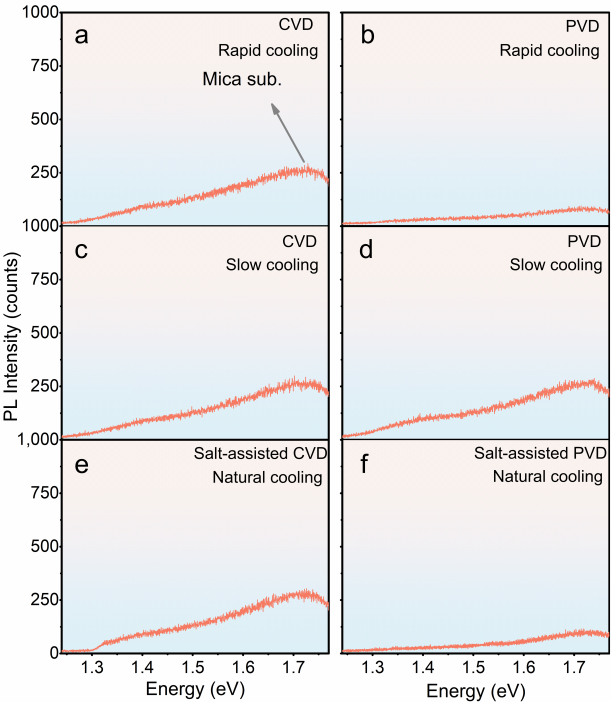


Supplementary Fig. 5| PL characterization of In2Se3 films grown on mica substrates via CVD and PVD under various growth conditions**.** PL spectrum of In2Se3 grown under rapid cooling conditions via **a** CVD and **b** PVD, under slow cooling conditions via **c** CVD and **d** PVD, under natural cooling conditions via **e** salt-assisted CVD **f** salt-assisted PVD.


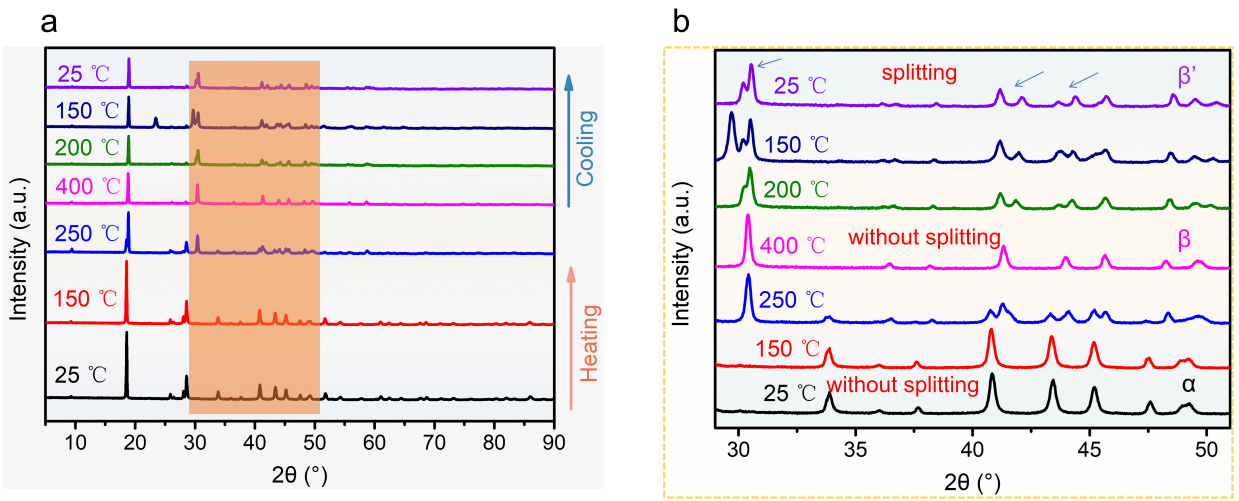


Supplementary Fig. 6| In situ temperature dependent XRD full spectrum of α-In2Se3 powder**.** **a** XRD spectra of α-In2Se3 at different temperatures **b** Partial enlarged view of XRD spectra. Original α-In₂Se₃ powder and β-In₂Se₃ above 200°C show unsplit XRD peaks. However, when cooled below 200°C, the XRD patterns exhibit characteristic peak splitting, which is typical of β′-In2Se3 with anisotropic lattice distortion and symmetry breaking.


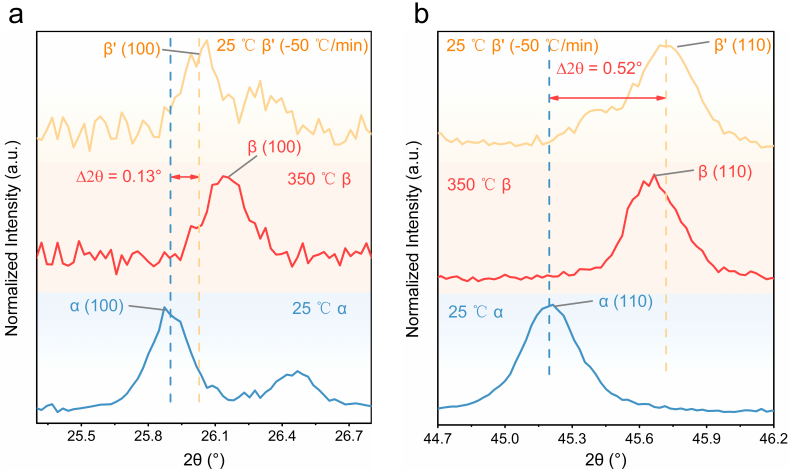


Supplementary Fig. 7| Comparison of XRD peak shifts during the α→β→β′ phase transition**.** **a** (100) . **b** (110) . Differential XRD peak shifting emerges in β'-In2Se3 derived from cooled α-phase powder, with the () reflection demonstrating significantly stronger shifts than () .

**
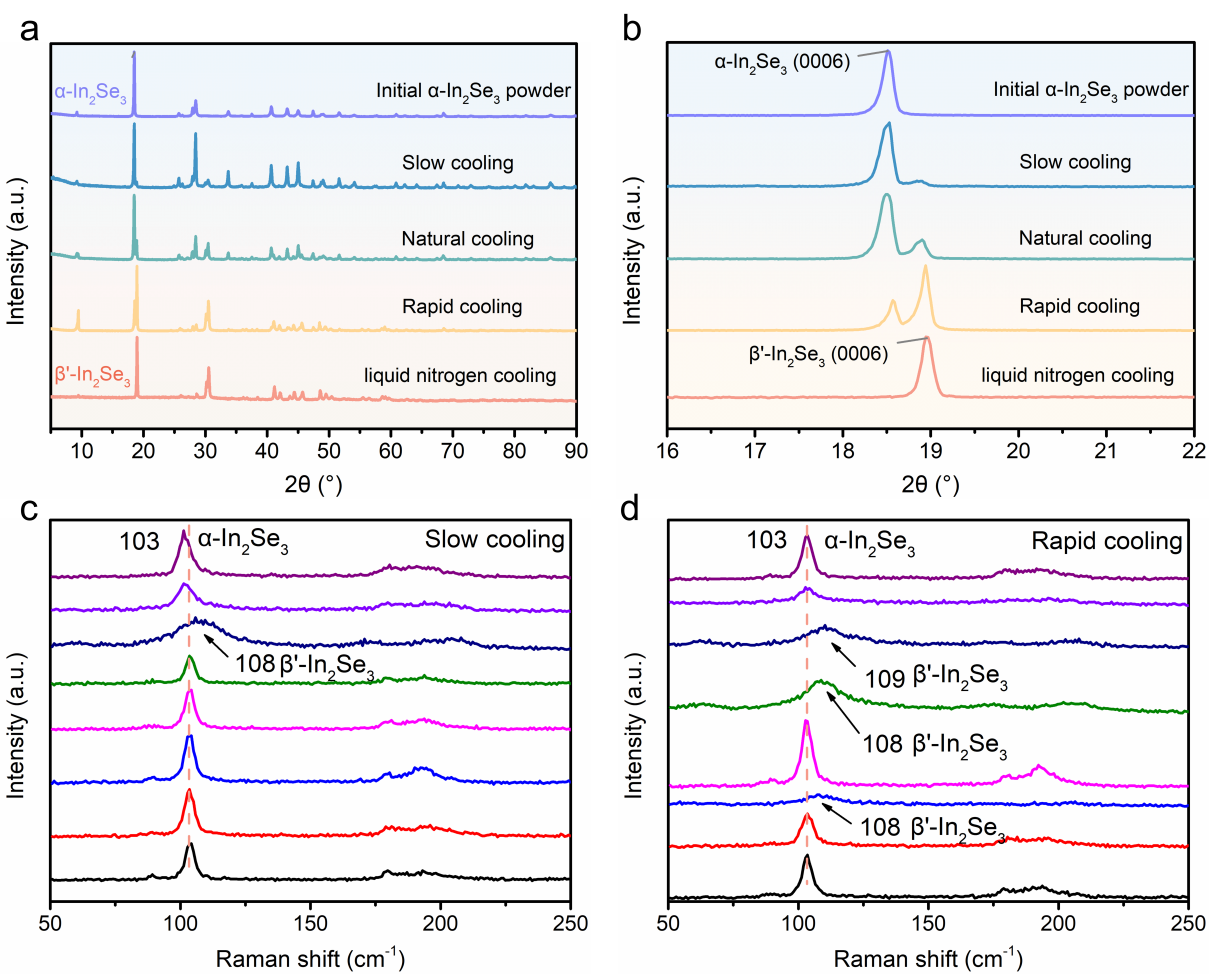
**

Supplementary Fig. 8| Phase characterization of α-In2Se3 cooled to room temperature at different cooling rates after heating**.** **a** NormalizedXRD full spectra of α-In2Se3 powder cooled to room temperature at different cooling rates after heating. **b** Partial enlarged view of (006) spectra. **c** Raman spectra of slow-cooled In₂Se₃ powder at eight distinct spatial positions. **d** Raman spectra of rapid-cooled In₂Se₃ powder at eight distinct spatial positions. From b, it is observed that after liquid-nitrogen cooling of heated α-In2Se3, only the (006) peak of β'-In2Se3 remains. As the cooling rate decreases, the intensity of β'-In2Se3's (006) peak diminishes, while the (006) peak intensity of α-In2Se3 progressively increases. Notably, the (006) peak of β'-In2Se3 virtually disappears after slow cooling compared to the original α-In2Se3 (006) peak. This indicates that the β phase spontaneously transforms into β' upon cooling, and β'-In2Se3 thermally relaxes back to α-In₂Se₃ with reduced cooling rates. Furthermore, Raman tests performed at multiple locations on both slow-cooled and rapidly cooled specimens reveals a significant presence of α-phase. Notably, the slow-cooled samples exhibit a higher proportion of α-In2Se3 compared to their rapidly cooled counterparts.


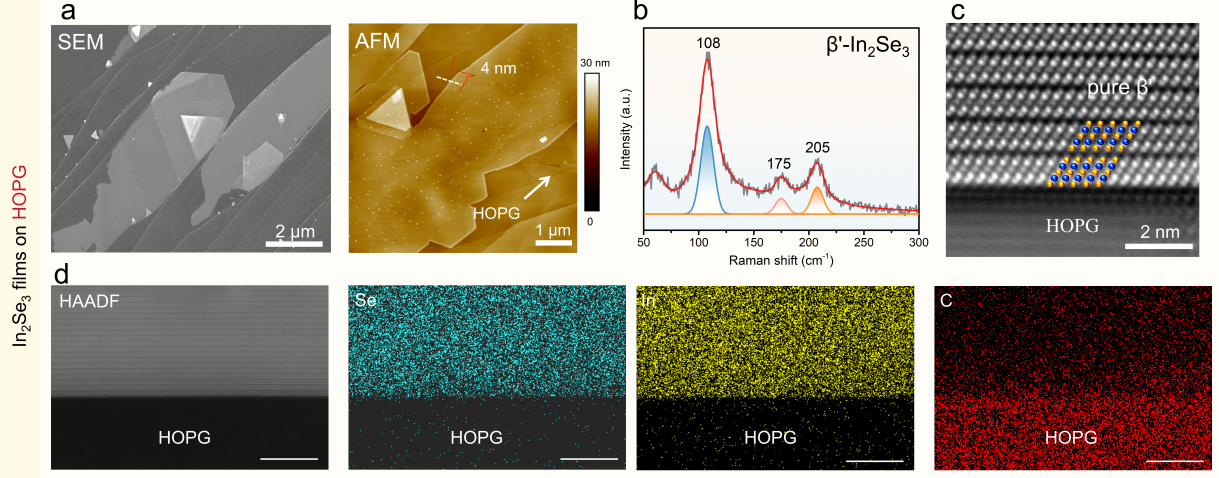


Supplementary Fig. 9| Cross-sectional TEM characterization of β'-In2Se3 grown on rigid HOPG substrates**.** a AFM image of β'-In2Se3 grown on a HOPG substrate. b Corresponding Raman spectrum. c Cross-sectional HAADF image of the as-grown In2Se3/HOPG interface. d Cross-sectional HAADF and corresponding EDS image of the as-grown In2Se3/HOPG interface. Scale bar: 10nm. β'-In2Se3 grown on HOPG via PVD method using slow cooling rate. Raman spectroscopy indicates the as-grown In2Se3 corresponds to β′ phase.


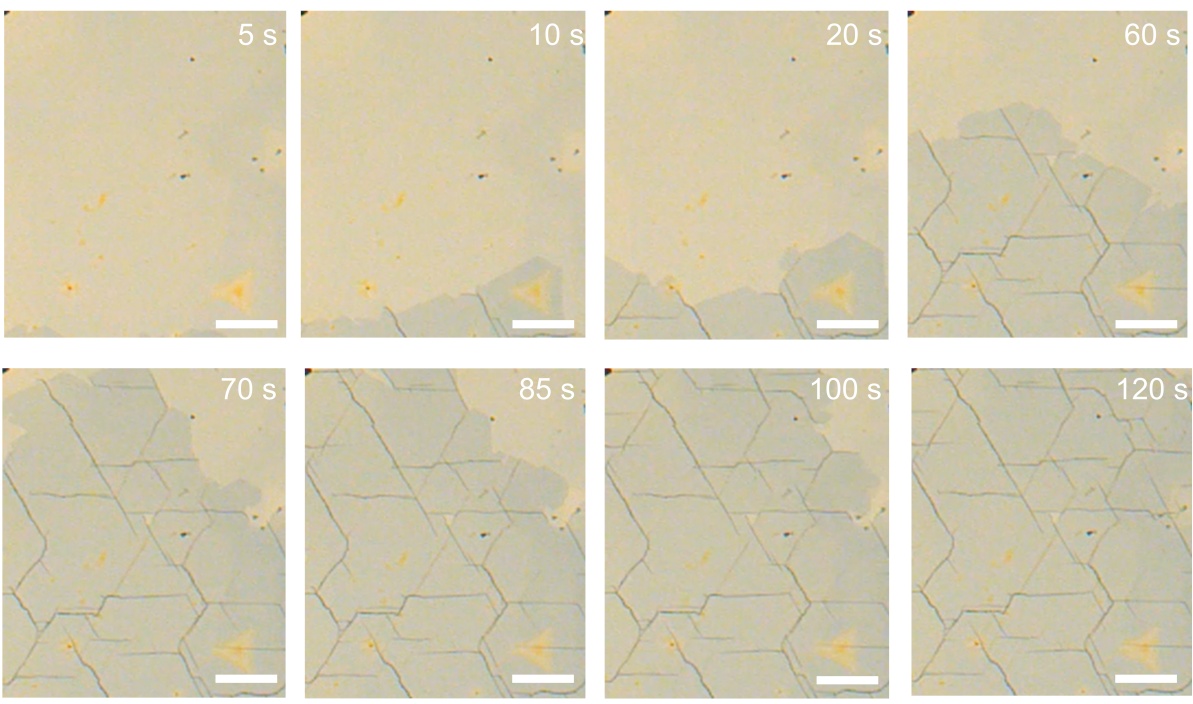


Supplementary Fig. 10| In situ optical microscopy image of time-dependent β'→α phase transition**.** As wrinkles propagate along the <> direction, β'-In2Se3 thin films undergo progressive phase transition to α-In2Se3.Scale bar: 50 μm


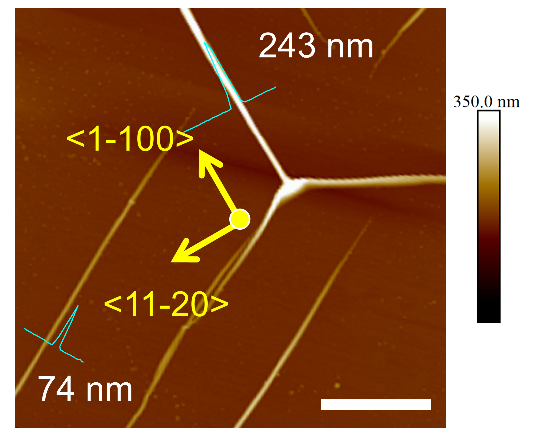


Supplementary Fig. 11| AFM image of wrinkles generated by stress release. wrinkles reach heights of several hundred nanometers. Scale bar: 4 μm


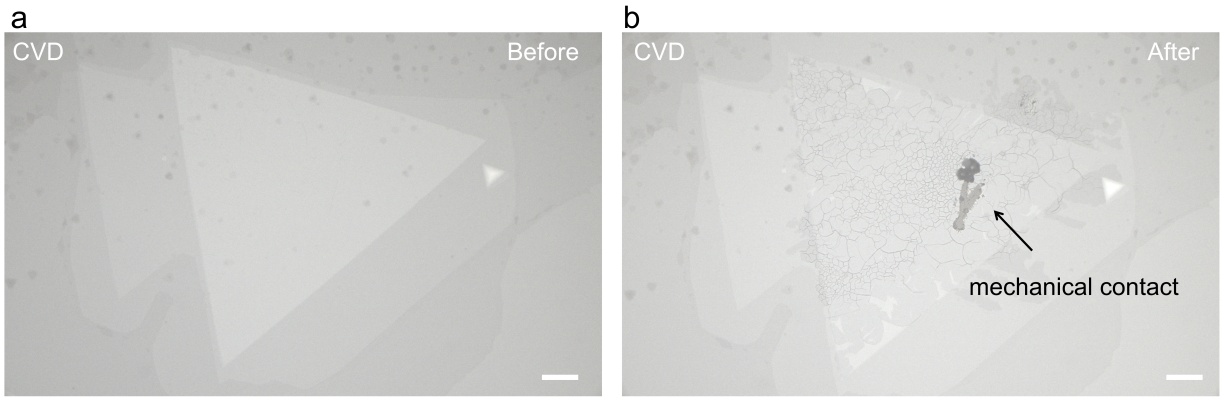


Supplementary Fig. 12| In situ strain release was performed on CVD grown triangular β′-In2Se3 domain**.** CVD-grown triangular β'-In2Se3 domain **a** before and **b** after stress release. Scale bar: 50 μm


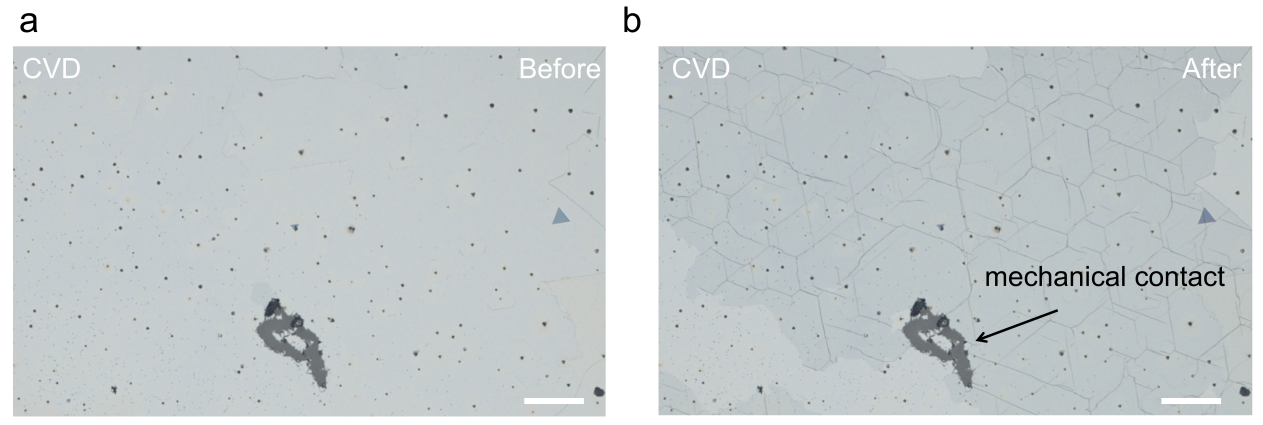


Supplementary Fig. 13| In situ strain release was performed on CVD grown continuous β′-In2Se3 film**.** CVD-grown continuous β'-In2Se3 film **a** before and **b** after stress release. Scale bar: 50 μm


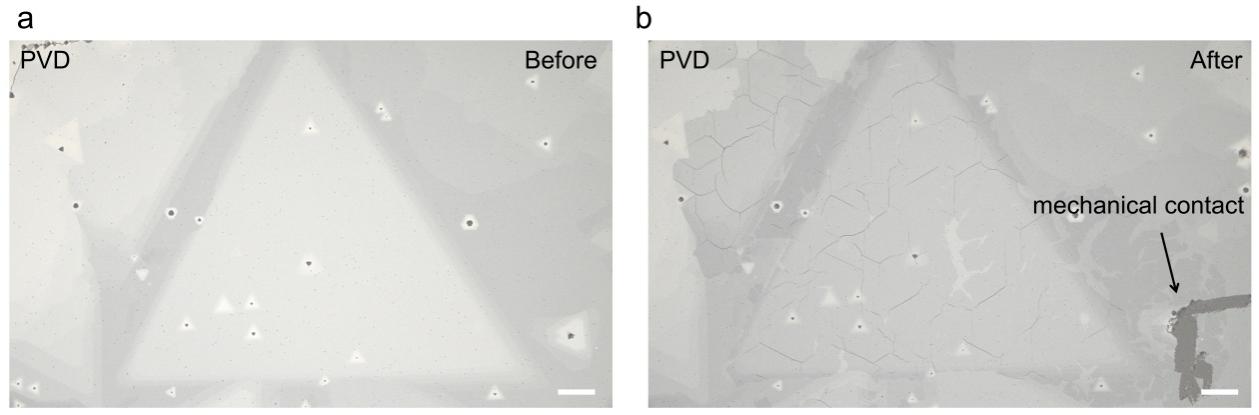


Supplementary Fig. 14| In situ strain release was performed on PVD grown triangular β′-In2Se3 domain**.** PVD-grown triangular β'-In2Se3 domain **a** before and **b** after stress release. Scale bar: 50 μm


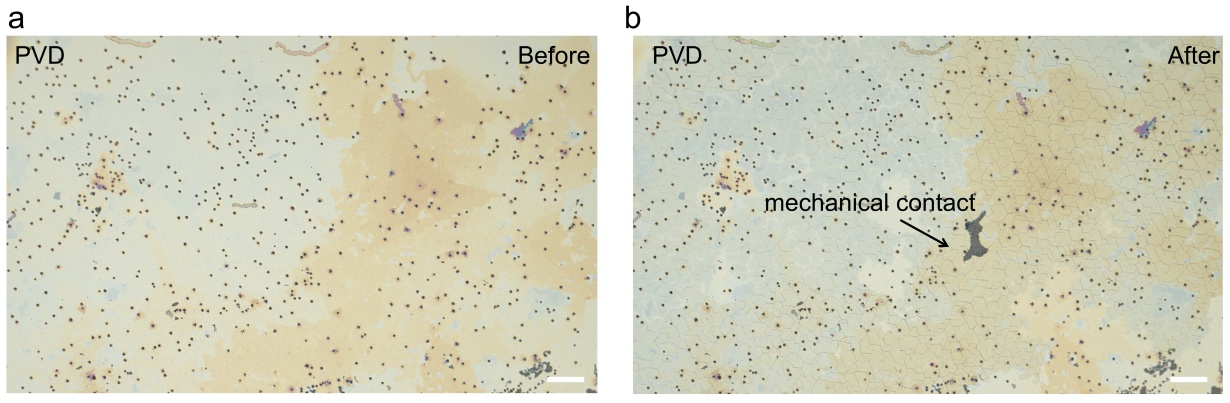


Supplementary Fig. 15| In situ strain release was performed on PVD grown continuous β′-In2Se3 film**.** PVD-grown continuous β'-In2Se3 film **a** before and **b** after stress release. Scale bar: 50 μm


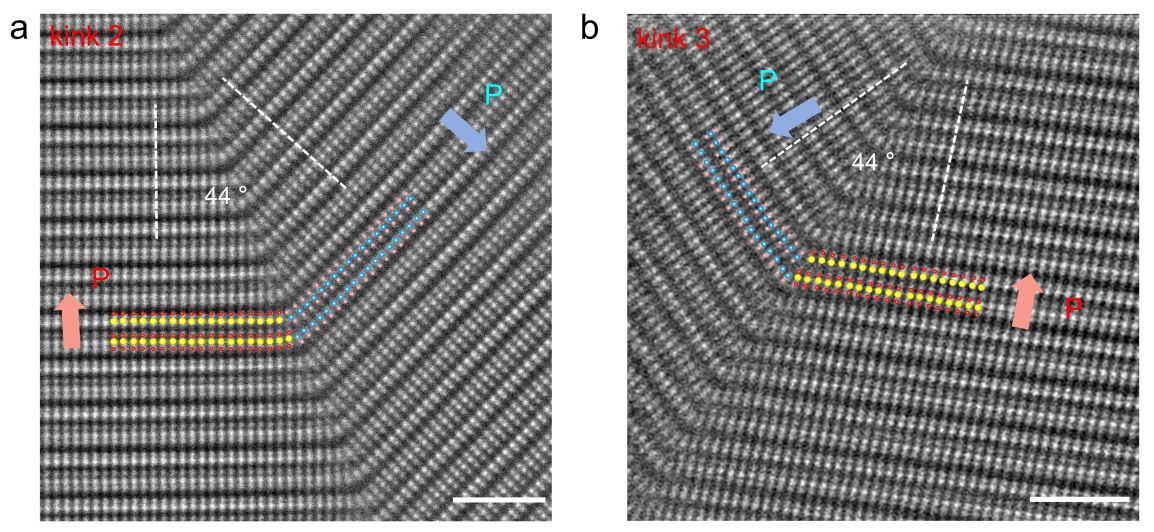


Supplementary Fig. 16| HAADF images of kinks located at bottom of the wrinkle**. a** kink2 with 44° bending angle. **b** kink3 with 44° bending angle. Atomic-resolution characterization clearly reveals antiparallel displacement of central Se atoms in α-In2Se3 at kink2 and kink3 boundaries, generating domains with opposing polarization directions. Scale bar: 2 nm.


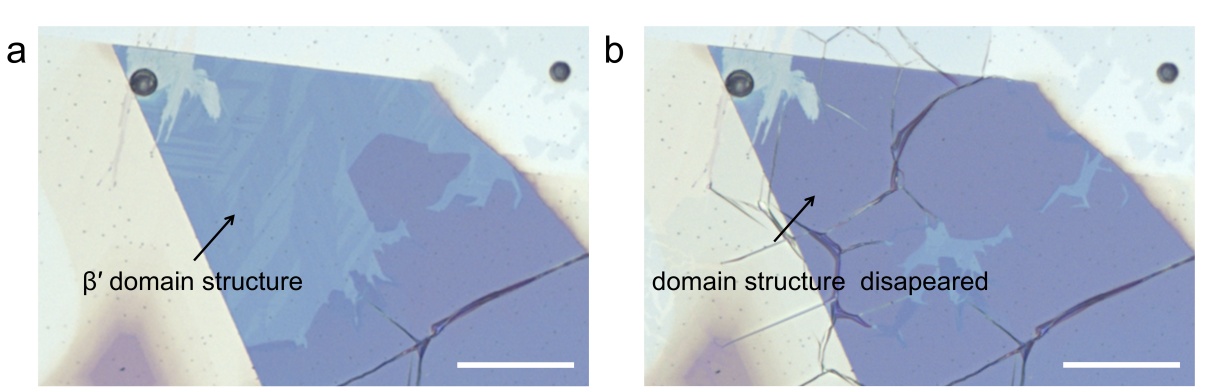


Supplementary Fig. 17| Polarized light optical microscopy image of disappearance of distinctive domain structures following phase transition**. a** As-grown β'-In2Se3 film exhibiting domain structures. **b** Wrinkle propagation triggering β'→α phase transition with domain dissolution. Through in situ optical microscopy, we observed the characteristic domain structure in β'-In2Se3 progressively dissolve during wrinkle propagation, indicating the β'→α phase transition in real time. (Supplementary Video 1) Scale bar: 25 μm


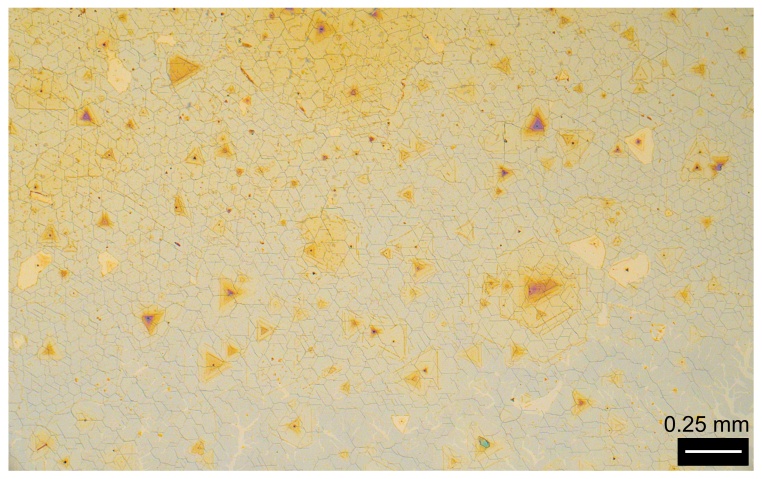


Supplementary Fig. 18| Optical image of centimeter-scale α-In2Se3 films fabricated by mechanical-contact-induced stress release**.**


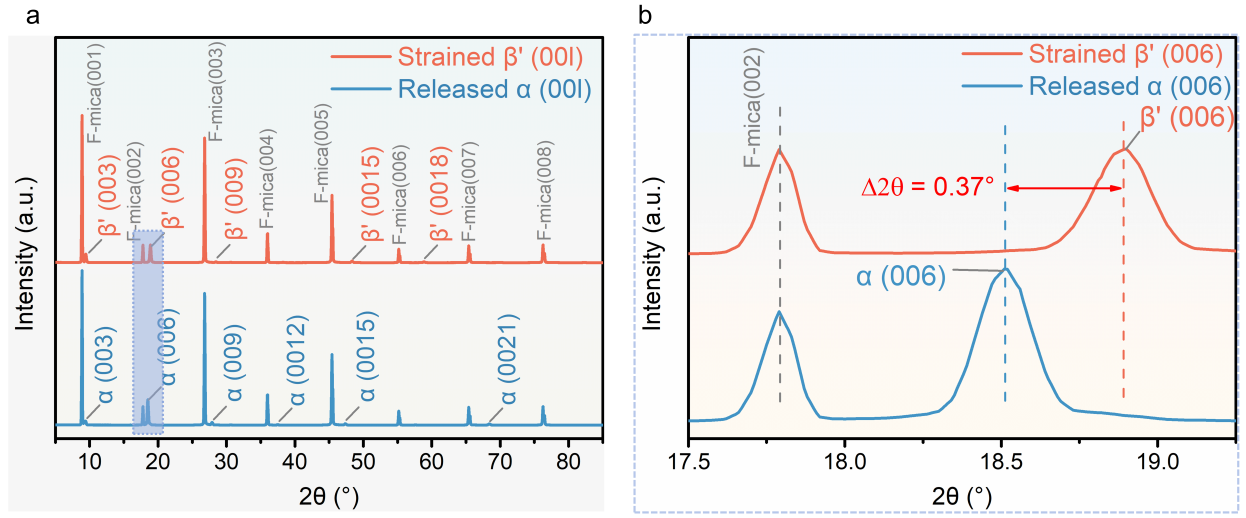


Supplementary Fig. 19| Characterization of the (00l) interplanar spacing shifts of β'-In2Se3 before and after stress release**. a** Comparative XRD spectra of (00l) reflections between stressed β'-In2Se3 and stress-released α-In2Se3. **b** Partial enlarged views of (006) reflections for stressed β′-In2Se3 and stress-released α-In2Se3. Notably, stress release transforms β′-In2Se3 grown on mica into α-In2Se3 while preserving the original out-of-plane epitaxial relationship: the parallelism between mica (00l) and In₂Se₃ (00l) planes remains intact. However, the (00l) interplanar spacing increases following the β'→α phase transition, exhibiting identical expansion behavior to that observed in powdered α-In2Se3 during the same phase transformation.


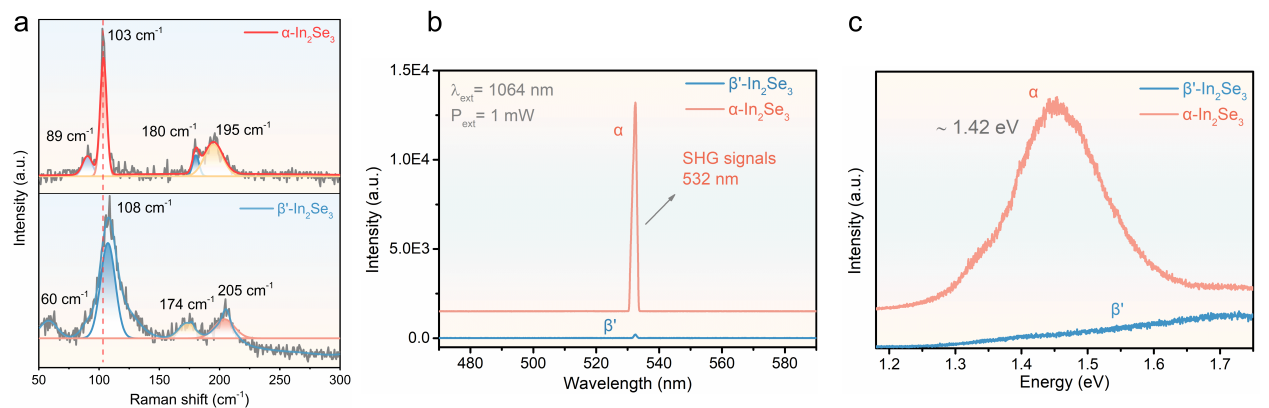


Supplementary Fig. 20| Characterization of physical properties before and after stress release**.** **a** Comparison of Raman spectra before (β'-In2Se3) and after (α-In2Se3) stress release. **b** Comparison of SHG spectra before (β'-In2Se3) and after (α-In2Se3) stress release. **c** Comparison of PL spectra before (β'-In2Se3) and after (α-In2Se3) stress release.


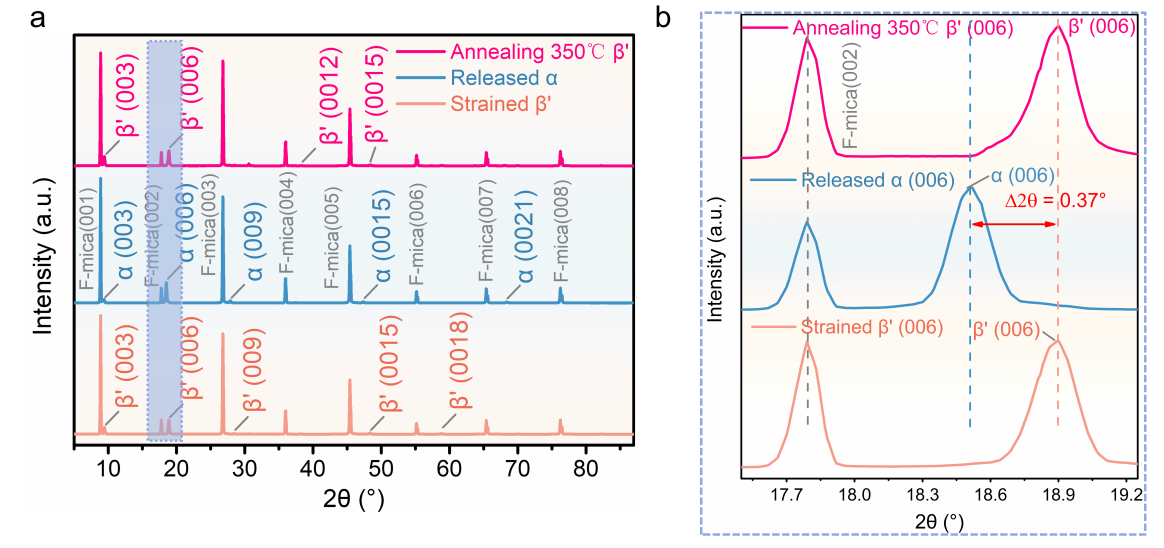


Supplementary Fig. 21| Characterization of the (00l) interplanar spacing shifts of released α-In2Se3 after annealing**. a** Comparative XRD spectra of (00l) reflections between stressed β'-In2Se3, stress-released α-In2Se3 and annealed β'-In2Se3. **b** Partial enlarged views of (006) reflections for stressed β′-In2Se3, stress-released α-In2Se3 and annealed β'-In2Se3. Notably, Following annealing of the stress-released α-In2Se3, the out-of-plane epitaxial relationship remains unchanged: the parallelism between mica (00l) and In2Se3 (00l) planes remains intact. Moreover, the (00l) diffraction peak positions of the annealed In2Se3 precisely coincide with those of the original as-grown β′-In2Se3 on mica. This demonstrates the successful α→β' phase reversal achieved via thermal annealing on mica substrates.


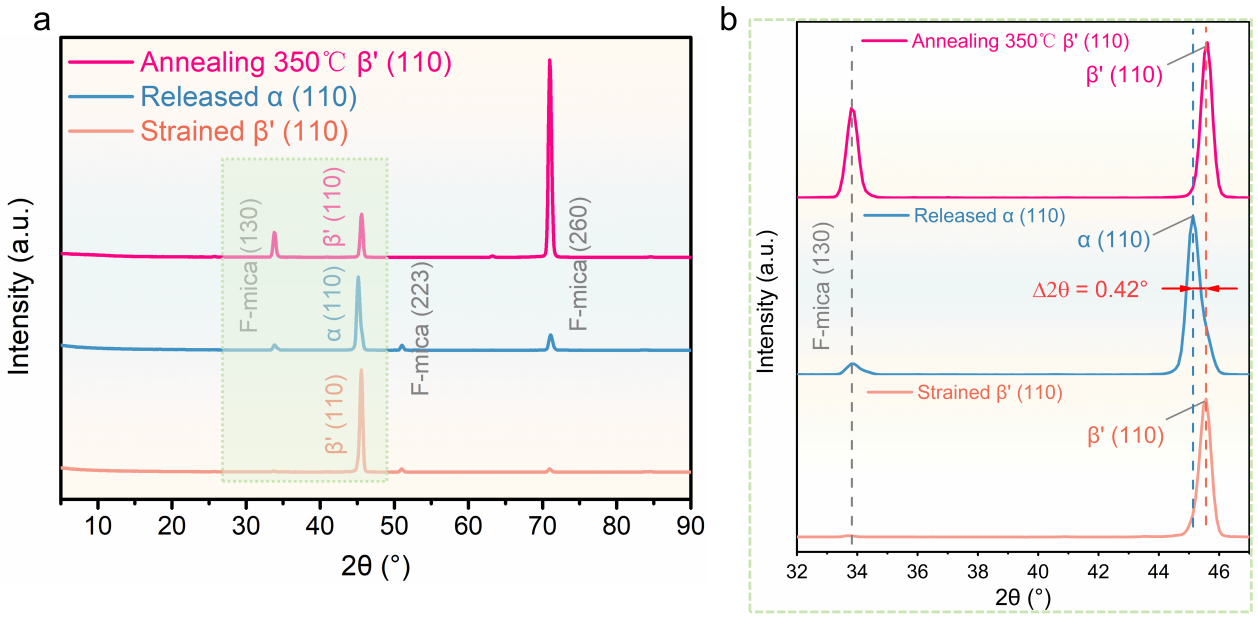


Supplementary Fig. 22| Characterization of the (110) interplanar spacing shifts of released α-In2Se3 after annealing**. a** Comparative in-plane XRD spectra of (110) reflections between stressed β'-In2Se3, stress-released α-In2Se3 and annealed β'-In2Se3. **b** Partial enlarged views of (110) reflections for stressed β′-In2Se3, stress-released α-In2Se3 and annealed β'-In2Se3. Remarkably, annealing of stress-released α-In2Se3 preserves the in-plane epitaxial registry, evidenced by persistent alignment between mica (130) and In₂Se₃ (110) planes. Furthermore, the annealed (110) diffraction peaks perfectly match those of pristine β′-In2Se3 on mica, demonstrating complete α→β' phase reversion via annealing processing.


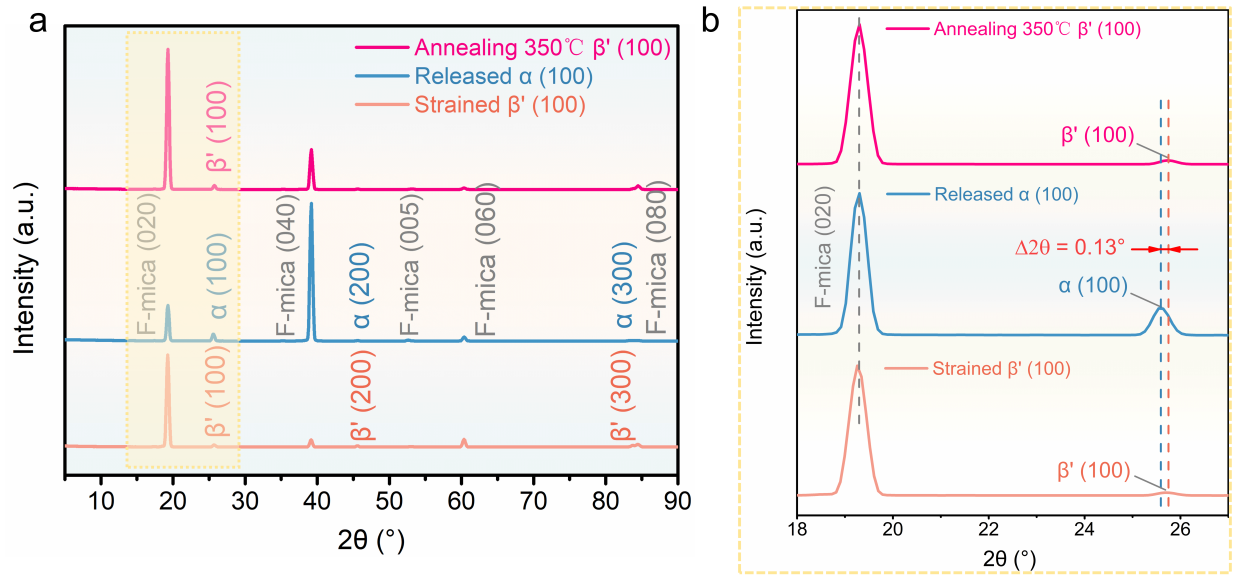


Supplementary Fig. 23| Characterization of the (100) peak shifts of released α-In2Se3 after annealing**.** **a** Comparative XRD spectra of (100) reflections between stressed β'-In2Se3, stress-released α-In₂Se₃ and annealed β'-In2Se3. **b** Partial enlarged views of (100) reflections for stressed β′-In2Se3, stress-released α-In2Se3 and annealed β'-In2Se3. Remarkably, annealing of stress-relaxed α-In2Se3 preserves the original in-plane epitaxial registry: mica (100) ∥ In2Se3 (010) alignment remains undisturbed. Furthermore, the annealed (100) diffraction peaks precisely recover the original β′-In2Se3 peak positions, confirming complete α→β' phase reversal via thermally driven transformation on mica.


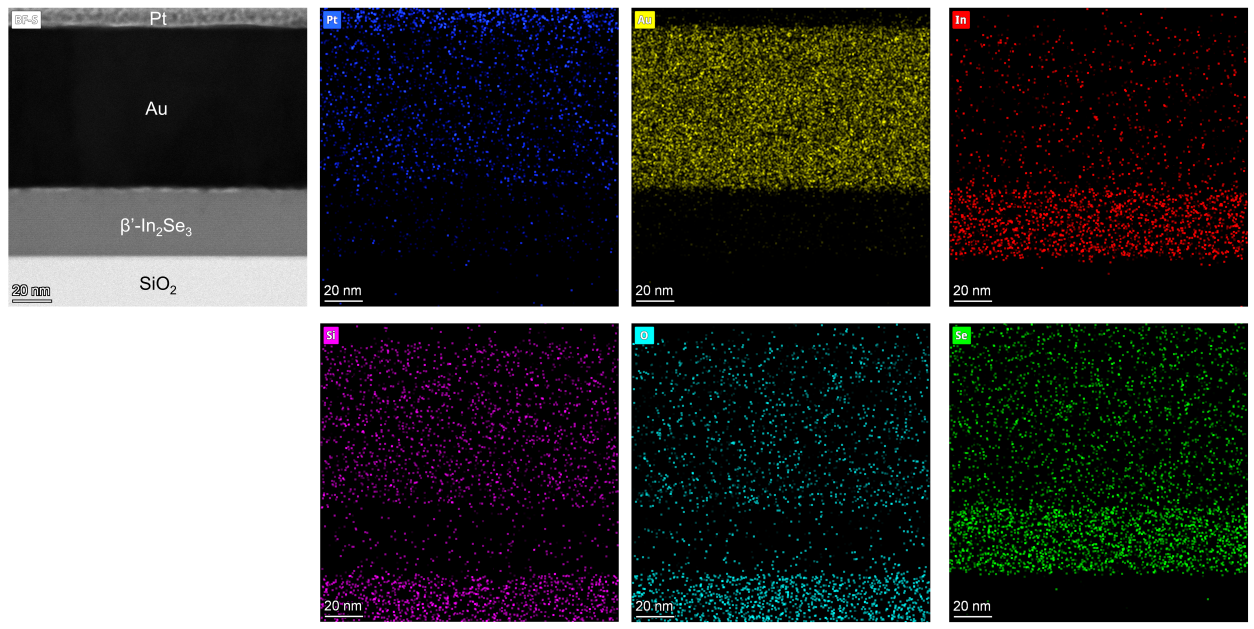


Supplementary Fig. 24| Cross-sectional TEM characterization of β'-In2Se3 on rigid SiO2/Si substrates (after annealing)**.** Cross-sectional HAADF and corresponding EDS image of the β'-In2Se3/SiO2 interface.


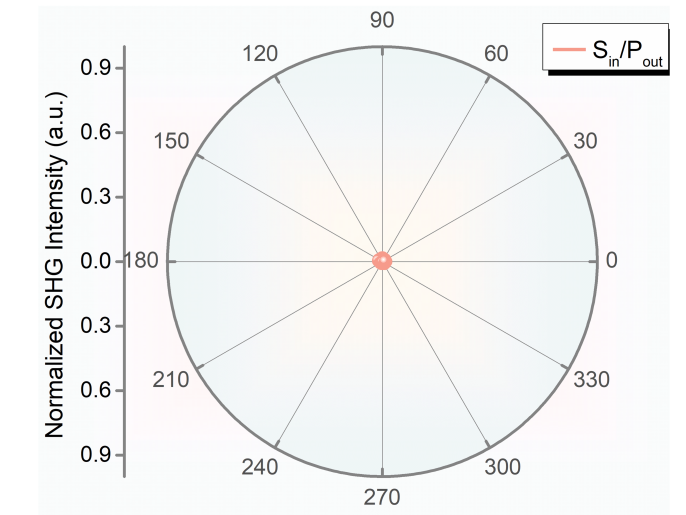


Supplementary Fig. 25| Angle-resolved SHG spectra of strain-released α-In2Se3 films on mica after annealing**.** Upon annealing, α-In₂Se₃ transforms into β′-In2Se3 with concomitant disappearance of SHG signal.


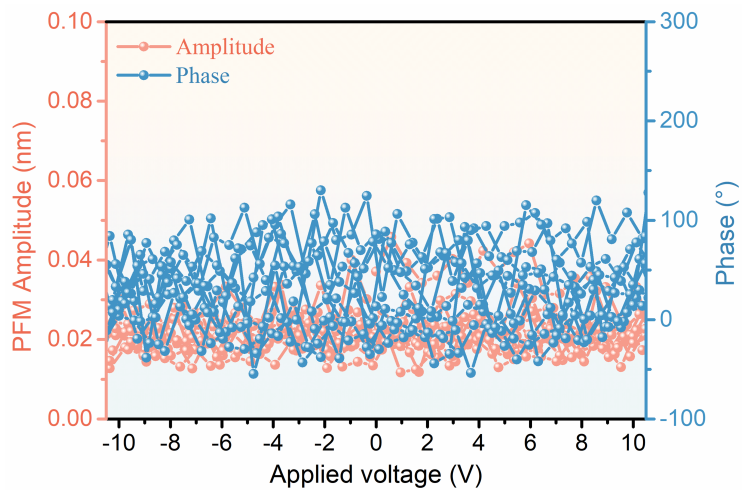


Supplementary Fig. 26| Annealing of stress-released α-In2Se3 eliminates its ferroelectricity**.** After annealing the α-In2Se3 transferred on the Au coated SiO₂/Si substrate, the ferroelectric phase-voltage hysteresis loop and amplitude-voltage butterfly loop disappeared.


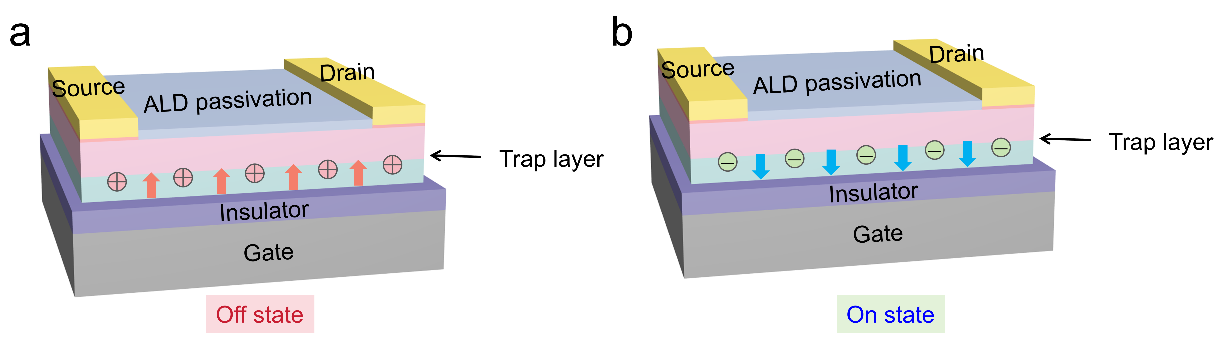


Supplementary Fig. 27| Operational states diagrams of vertical α-In2Se3/β′-In₂Se₃ Fe-FETs under P-down and P-up conditions**.** When α-In2Se3 is in the P-up polarization state, a trap layer forms at the α-In2Se3/β′-In₂Se₃ interface, confining electrons and depleting the β′-In2Se3 channel, thereby switching the device to the off-state. Conversely, under P-down polarization, holes become confined at the interface while electrons accumulate in β′-In2Se3, establishing the on-state.
